# Supplementary material for: Functional Characterization and Toxicological Study of Proanthocyanidins in Weaned Pigs
Source: MDPI journal article supplement (doi:10.3390/toxins15090558), 2023-09-07
Supplement: s1 [file s1]

## Supplementary Materials

# Functional Characterization and Toxicological Study of Proanthocyanidins in Weaned Pigs

Jiahao Liu, Yong Qiao, Bing Yu, Yuheng Luo, Zhiqing Huang, Xiangbing Mao, Jie Yu, Ping Zheng, Hui Yan, Yan Li, and Jun He

**Table S1.** Primers sequences used for quantitative RT-PCR.

| Gene           | Primer sequence (5'–3')                              |
|----------------|------------------------------------------------------|
| $\beta$ -Actin | F: TGGAACGGTGAAGGTGACAGC<br>R: GCTTTTGGGAAGGCAGGGACT |
| <i>FATP-1</i>  | F:GGAGTAGAGGGCAAAGCAGG<br>R:AGGTCTGGCGTGGGTCAAAG     |
| <i>FATP-4</i>  | F: TTCATCAAGACGGTCAGGCG<br>R: AGACGGTGGCAGCGAATAAG   |
| MUC1           | F:GGTGCTGGTCTGTATTCTGGT<br>R:TGCCCACAGTTCTTTCGTCG    |
| MUC2           | F:GGACGACACCATCTACCTCAC<br>R:CCAGCTCGGGAATAGACCTT    |
| PepT1-F        | F:CAGACTTCGACCACAACGGA<br>R:TTATCCCGCCAGTACCCAGA     |
| Claudin-2      | F:CTCCCTGTTCTCCCTGATAGC<br>R:TCACTCTTGGCTTTGGGTGG    |

FATP-1, 4, fatty acid transport protein-1,4; PepT1, Oligopeptide Transporter 1; MUC1,2, mucin 1,2.
